# Supplementary material
Source: publisher figshare collection journal article supplement (https://acs.figshare.com/ndownloader/files/3830545)
Supplement: Supplementary file 1 [file 3830545]

data_Chem.Commun.Boillot

_publ_requested_journal          Inorg.Chem.
_publ_contact_author_name        'M.-L. Boillot'
_publ_contact_author_address     
;Institut de Chimie Mol\'eculaire et des Mat\'eriaux d'Orsay,
UMR CNRS 8182,
B\^at 420,
Universit\'e Paris-Sud,
91405 Orsay cedex,
France.
;
_publ_contact_author_email       marie-laure.boillot@u-psud.fr
_publ_contact_author_phone       +33-1.69.15.47.55
_publ_contact_author_fax         +33-1.69.15.47.54
loop_
_publ_author_name
_publ_author_address
'Iasco, Olga'
;Institut de Chimie Mol\'eculaire et des Mat\'eriaux d'Orsay,
UMR CNRS 8182,
B\^at 420,
Universit\'e Paris-Sud,
91405 Orsay cedex,
France.
;
'Rivi\`ere, Eric'
;Institut de Chimie Mol\'eculaire et des Mat\'eriaux d'Orsay,
UMR CNRS 8182,
B\^at 420,
Universit\'e Paris-Sud,
91405 Orsay cedex,
France.
;
"Guillot, R\'egis"
;Institut de Chimie Mol\'eculaire et des Mat\'eriaux d'Orsay,
UMR CNRS 8182,
B\^at 420,
Universit\'e Paris-Sud,
91405 Orsay cedex,
France.
;
'Boillot, Marie-Laure'
;Institut de Chimie Mol\'eculaire et des Mat\'eriaux d'Orsay,
UMR CNRS 8182,
B\^at 420,
Universit\'e Paris-Sud,
91405 Orsay cedex,
France.
;


data_FeII(pap-5-NO2)2_320K
#1966GuillotICMMO320k

_database_code_CSD              'CCDC 991079'

_audit_creation_method           SHELXL-97
_chemical_name_systematic        ?
_chemical_name_common            ?
_chemical_formula_moiety         'C24 H16 Fe N6 O6'
_chemical_formula_sum            'C24 H16 Fe N6 O6'
_chemical_melting_point          ?

_exptl_crystal_description       plate
_exptl_crystal_colour            black

_diffrn_ambient_temperature      320(2)
_chemical_formula_weight         540.28

loop_
_atom_type_symbol
_atom_type_description
_atom_type_scat_dispersion_real
_atom_type_scat_dispersion_imag
_atom_type_scat_source
C C 0.0031 0.0016 'International Tables Vol C Tables 4.2.6.8 and 6.1.1.4'
H H 0.0000 0.0000 'International Tables Vol C Tables 4.2.6.8 and 6.1.1.4'
N N 0.0061 0.0033 'International Tables Vol C Tables 4.2.6.8 and 6.1.1.4'
O O 0.0109 0.0061 'International Tables Vol C Tables 4.2.6.8 and 6.1.1.4'
Fe Fe 0.3460 0.8476 'International Tables Vol C Tables 4.2.6.8 and 6.1.1.4'

_symmetry_cell_setting           monoclinic
_symmetry_space_group_name_H-M   'C 2/c'
_symmetry_int_tables_number      15
_chemical_absolute_configuration .

loop_
_symmetry_equiv_pos_as_xyz
'x, y, z'
'-x, y, -z+1/2'
'x+1/2, y+1/2, z'
'-x+1/2, y+1/2, -z+1/2'
'-x, -y, -z'
'x, -y, z-1/2'
'-x+1/2, -y+1/2, -z'
'x+1/2, -y+1/2, z-1/2'

_cell_length_a                   23.267(18)
_cell_length_b                   8.902(7)
_cell_length_c                   11.967(9)
_cell_angle_alpha                90.00
_cell_angle_beta                 114.198(13)
_cell_angle_gamma                90.00
_cell_volume                     2261(3)
_cell_formula_units_Z            4
_cell_measurement_temperature    320(2)
_cell_measurement_reflns_used    ?
_cell_measurement_theta_min      ?
_cell_measurement_theta_max      ?
_exptl_crystal_size_max          0.14
_exptl_crystal_size_mid          0.04
_exptl_crystal_size_min          0.01
_exptl_crystal_density_meas      ?
_exptl_crystal_density_diffrn    1.587
_exptl_crystal_density_method    'not measured'
_exptl_crystal_F_000             1104
_exptl_absorpt_coefficient_mu    0.723
_exptl_absorpt_correction_type   multi-scan
_exptl_absorpt_correction_T_min  0.8903
_exptl_absorpt_correction_T_max  0.9930
_exptl_absorpt_process_details   SADABS

_exptl_special_details           
; 
 ? 
;
_diffrn_radiation_probe          x-ray
_diffrn_radiation_type           MoK\a
_diffrn_radiation_wavelength     0.71073
_diffrn_source                   'fine-focus sealed tube'
_diffrn_source_type              'kappa X8 APEX II Bruker ICMMO'
_diffrn_radiation_monochromator  graphite
_diffrn_measurement_device_type  ?
_diffrn_measurement_method       ?
_diffrn_detector_area_resol_mean ?
_diffrn_standards_number         ?
_diffrn_standards_interval_count ?
_diffrn_standards_interval_time  ?
_diffrn_standards_decay_%        ?
_diffrn_reflns_number            11304
_diffrn_reflns_av_R_equivalents  0.0567
_diffrn_reflns_av_sigmaI/netI    0.0457
_diffrn_reflns_limit_h_min       -28
_diffrn_reflns_limit_h_max       28
_diffrn_reflns_limit_k_min       -10
_diffrn_reflns_limit_k_max       11
_diffrn_reflns_limit_l_min       -13
_diffrn_reflns_limit_l_max       14
_diffrn_reflns_theta_min         2.48
_diffrn_reflns_theta_max         26.40
_reflns_number_total             2292
_reflns_number_gt                1627
_reflns_threshold_expression     >2sigma(I)

_computing_data_collection       ?
_computing_cell_refinement       ?
_computing_data_reduction        ?
_computing_structure_solution    'SHELXS-97 (Sheldrick, 1990)'
_computing_structure_refinement  'SHELXL-97 (Sheldrick, 1997)'
_computing_molecular_graphics    ?
_computing_publication_material  ?

_refine_special_details          
; 
 Refinement of F^2^ against ALL reflections.  The weighted R-factor wR and 
 goodness of fit S are based on F^2^, conventional R-factors R are based 
 on F, with F set to zero for negative F^2^. The threshold expression of 
 F^2^ > 2sigma(F^2^) is used only for calculating R-factors(gt) etc. and is 
 not relevant to the choice of reflections for refinement.  R-factors based 
 on F^2^ are statistically about twice as large as those based on F, and R- 
 factors based on ALL data will be even larger. 
;

_refine_ls_structure_factor_coef Fsqd
_refine_ls_matrix_type           full
_refine_ls_weighting_scheme      calc
_refine_ls_weighting_details     
'calc w=1/[\s^2^(Fo^2^)+(0.0492P)^2^+1.6816P] where P=(Fo^2^+2Fc^2^)/3'
_atom_sites_solution_primary     direct
_atom_sites_solution_secondary   difmap
_atom_sites_solution_hydrogens   geom
_refine_ls_hydrogen_treatment    constr
_refine_ls_extinction_method     none
_refine_ls_extinction_coef       ?
_refine_ls_number_reflns         2292
_refine_ls_number_parameters     168
_refine_ls_number_restraints     0
_refine_ls_R_factor_all          0.0718
_refine_ls_R_factor_gt           0.0431
_refine_ls_wR_factor_ref         0.1130
_refine_ls_wR_factor_gt          0.0992
_refine_ls_goodness_of_fit_ref   1.016
_refine_ls_restrained_S_all      1.016
_refine_ls_shift/su_max          0.000
_refine_ls_shift/su_mean         0.000

loop_
_atom_site_label
_atom_site_type_symbol
_atom_site_fract_x
_atom_site_fract_y
_atom_site_fract_z
_atom_site_U_iso_or_equiv
_atom_site_adp_type
_atom_site_occupancy
_atom_site_symmetry_multiplicity
_atom_site_calc_flag
_atom_site_refinement_flags
_atom_site_disorder_assembly
_atom_site_disorder_group
C1 C -0.09822(14) 0.2110(4) 0.5806(3) 0.0625(9) Uani 1 1 d . . .
H1 H -0.1206 0.2287 0.6283 0.075 Uiso 1 1 calc R . .
C2 C -0.12281(15) 0.1123(4) 0.4857(3) 0.0658(9) Uani 1 1 d . . .
H2 H -0.1607 0.0635 0.4702 0.079 Uiso 1 1 calc R . .
C3 C -0.09116(16) 0.0861(4) 0.4136(3) 0.0645(9) Uani 1 1 d . . .
H3 H -0.1070 0.0193 0.3483 0.077 Uiso 1 1 calc R . .
C4 C -0.03490(14) 0.1610(3) 0.4396(3) 0.0526(7) Uani 1 1 d . . .
H4 H -0.0126 0.1458 0.3914 0.063 Uiso 1 1 calc R . .
C5 C -0.01250(12) 0.2574(3) 0.5372(2) 0.0407(6) Uani 1 1 d . . .
C6 C 0.04611(12) 0.3404(3) 0.5712(2) 0.0416(6) Uani 1 1 d . . .
H6 H 0.0721 0.3252 0.5304 0.050 Uiso 1 1 calc R . .
C7 C 0.11443(11) 0.5251(3) 0.7045(2) 0.0388(6) Uani 1 1 d . . .
C8 C 0.11695(13) 0.6171(3) 0.8033(2) 0.0476(7) Uani 1 1 d . . .
C9 C 0.16990(15) 0.7107(4) 0.8587(3) 0.0578(8) Uani 1 1 d . . .
H9 H 0.1730 0.7724 0.9236 0.069 Uiso 1 1 calc R . .
C10 C 0.21677(14) 0.7117(4) 0.8178(3) 0.0569(8) Uani 1 1 d . . .
H10 H 0.2520 0.7724 0.8561 0.068 Uiso 1 1 calc R . .
C11 C 0.21206(12) 0.6228(3) 0.7198(3) 0.0495(7) Uani 1 1 d . . .
C12 C 0.16083(12) 0.5304(3) 0.6610(3) 0.0436(6) Uani 1 1 d . . .
H12 H 0.1577 0.4731 0.5938 0.052 Uiso 1 1 calc R . .
N1 N -0.04372(10) 0.2839(3) 0.6092(2) 0.0494(6) Uani 1 1 d . . .
N2 N 0.06055(10) 0.4343(2) 0.65857(19) 0.0395(5) Uani 1 1 d . . .
N3 N 0.26171(12) 0.6278(3) 0.6761(3) 0.0681(8) Uani 1 1 d . . .
O1 O 0.07125(10) 0.6138(3) 0.83911(18) 0.0641(6) Uani 1 1 d . . .
O2 O 0.31089(11) 0.6939(3) 0.7408(3) 0.0950(9) Uani 1 1 d . . .
O3 O 0.25297(13) 0.5669(3) 0.5784(3) 0.0943(9) Uani 1 1 d . . .
Fe Fe 0.0000 0.46060(7) 0.7500 0.0491(2) Uani 1 2 d S . .

loop_
_atom_site_aniso_label
_atom_site_aniso_U_11
_atom_site_aniso_U_22
_atom_site_aniso_U_33
_atom_site_aniso_U_23
_atom_site_aniso_U_13
_atom_site_aniso_U_12
C1 0.0412(18) 0.080(2) 0.071(2) 0.0054(19) 0.0275(16) -0.0099(16)
C2 0.0460(18) 0.064(2) 0.081(2) 0.0061(19) 0.0199(18) -0.0120(16)
C3 0.058(2) 0.0520(19) 0.068(2) -0.0031(16) 0.0100(17) -0.0013(15)
C4 0.0516(18) 0.0519(18) 0.0538(18) -0.0023(15) 0.0212(15) 0.0018(14)
C5 0.0359(14) 0.0489(16) 0.0384(15) 0.0056(12) 0.0162(12) 0.0032(12)
C6 0.0386(15) 0.0518(17) 0.0411(15) 0.0037(13) 0.0229(12) 0.0014(12)
C7 0.0315(13) 0.0479(15) 0.0396(14) 0.0051(12) 0.0172(11) -0.0008(11)
C8 0.0462(16) 0.0618(19) 0.0390(15) 0.0004(14) 0.0217(13) -0.0019(14)
C9 0.0584(19) 0.068(2) 0.0439(17) -0.0084(15) 0.0174(15) -0.0120(16)
C10 0.0407(17) 0.064(2) 0.0581(19) 0.0051(16) 0.0127(15) -0.0084(14)
C11 0.0339(15) 0.0522(18) 0.0658(19) 0.0120(15) 0.0238(14) 0.0009(13)
C12 0.0405(15) 0.0437(15) 0.0537(17) 0.0043(13) 0.0264(13) 0.0010(12)
N1 0.0371(13) 0.0651(16) 0.0511(15) 0.0036(12) 0.0234(11) -0.0039(11)
N2 0.0337(11) 0.0513(14) 0.0388(12) 0.0023(11) 0.0202(10) 0.0011(10)
N3 0.0437(16) 0.0613(18) 0.112(3) 0.0107(17) 0.0452(17) -0.0032(13)
O1 0.0675(14) 0.0858(16) 0.0576(13) -0.0197(12) 0.0445(11) -0.0145(12)
O2 0.0478(14) 0.0912(19) 0.155(3) -0.0045(18) 0.0508(16) -0.0192(14)
O3 0.0857(19) 0.098(2) 0.139(3) -0.0243(19) 0.0864(19) -0.0203(16)
Fe 0.0409(3) 0.0703(4) 0.0483(4) 0.000 0.0306(3) 0.000

_geom_special_details            
; 
 All esds (except the esd in the dihedral angle between two l.s. planes) 
 are estimated using the full covariance matrix.  The cell esds are taken 
 into account individually in the estimation of esds in distances, angles 
 and torsion angles; correlations between esds in cell parameters are only 
 used when they are defined by crystal symmetry.  An approximate (isotropic) 
 treatment of cell esds is used for estimating esds involving l.s. planes. 
;

loop_
_geom_bond_atom_site_label_1
_geom_bond_atom_site_label_2
_geom_bond_distance
_geom_bond_site_symmetry_2
_geom_bond_publ_flag
C1 N1 1.338(4) . ?
C1 C2 1.363(5) . ?
C2 C3 1.364(5) . ?
C3 C4 1.386(4) . ?
C4 C5 1.369(4) . ?
C5 N1 1.356(3) . ?
C5 C6 1.455(4) . ?
C6 N2 1.272(3) . ?
C7 C12 1.378(4) . ?
C7 N2 1.401(3) . ?
C7 C8 1.420(4) . ?
C8 O1 1.299(3) . ?
C8 C9 1.408(4) . ?
C9 C10 1.366(4) . ?
C10 C11 1.381(4) . ?
C11 C12 1.380(4) . ?
C11 N3 1.451(4) . ?
N1 Fe 2.223(3) . ?
N2 Fe 2.121(2) . ?
N3 O3 1.227(4) . ?
N3 O2 1.237(4) . ?
O1 Fe 2.073(2) . ?
Fe O1 2.073(2) 2_556 ?
Fe N2 2.122(2) 2_556 ?
Fe N1 2.223(3) 2_556 ?

loop_
_geom_angle_atom_site_label_1
_geom_angle_atom_site_label_2
_geom_angle_atom_site_label_3
_geom_angle
_geom_angle_site_symmetry_1
_geom_angle_site_symmetry_3
_geom_angle_publ_flag
N1 C1 C2 123.7(3) . . ?
C1 C2 C3 119.1(3) . . ?
C2 C3 C4 118.8(3) . . ?
C5 C4 C3 119.2(3) . . ?
N1 C5 C4 122.4(3) . . ?
N1 C5 C6 114.8(2) . . ?
C4 C5 C6 122.9(2) . . ?
N2 C6 C5 117.7(2) . . ?
C12 C7 N2 125.8(2) . . ?
C12 C7 C8 121.6(3) . . ?
N2 C7 C8 112.6(2) . . ?
O1 C8 C9 122.3(3) . . ?
O1 C8 C7 120.1(3) . . ?
C9 C8 C7 117.6(2) . . ?
C10 C9 C8 120.5(3) . . ?
C9 C10 C11 120.2(3) . . ?
C12 C11 C10 121.7(3) . . ?
C12 C11 N3 118.9(3) . . ?
C10 C11 N3 119.4(3) . . ?
C7 C12 C11 118.3(3) . . ?
C1 N1 C5 116.8(3) . . ?
C1 N1 Fe 128.9(2) . . ?
C5 N1 Fe 114.00(18) . . ?
C6 N2 C7 126.5(2) . . ?
C6 N2 Fe 119.29(18) . . ?
C7 N2 Fe 114.23(17) . . ?
O3 N3 O2 123.8(3) . . ?
O3 N3 C11 119.0(3) . . ?
O2 N3 C11 117.2(3) . . ?
C8 O1 Fe 115.81(19) . . ?
O1 Fe O1 97.69(15) 2_556 . ?
O1 Fe N2 111.56(9) 2_556 . ?
O1 Fe N2 77.17(9) . . ?
O1 Fe N2 77.17(9) 2_556 2_556 ?
O1 Fe N2 111.56(9) . 2_556 ?
N2 Fe N2 167.31(13) . 2_556 ?
O1 Fe N1 93.13(10) 2_556 . ?
O1 Fe N1 151.22(8) . . ?
N2 Fe N1 74.05(9) . . ?
N2 Fe N1 96.80(9) 2_556 . ?
O1 Fe N1 151.22(8) 2_556 2_556 ?
O1 Fe N1 93.13(10) . 2_556 ?
N2 Fe N1 96.80(9) . 2_556 ?
N2 Fe N1 74.05(9) 2_556 2_556 ?
N1 Fe N1 89.95(14) . 2_556 ?

_diffrn_measured_fraction_theta_max 0.990
_diffrn_reflns_theta_full        25.00
_diffrn_measured_fraction_theta_full 0.994
_refine_diff_density_max         0.280
_refine_diff_density_min         -0.411
_refine_diff_density_rms         0.052


data_FeII(pap-5-NO2)2_100K
#1963GuillotICMMO100K

_database_code_CSD              'CCDC 991080'

_audit_creation_method           SHELXL-97
_chemical_name_systematic        ?
_chemical_name_common            ?
_chemical_formula_moiety         'C24 H16 Fe N6 O6'
_chemical_formula_sum            'C24 H16 Fe N6 O6'
_chemical_melting_point          ?

_exptl_crystal_description       plate
_exptl_crystal_colour            black

_diffrn_ambient_temperature      100(1)
_chemical_formula_weight         540.28

loop_
_atom_type_symbol
_atom_type_description
_atom_type_scat_dispersion_real
_atom_type_scat_dispersion_imag
_atom_type_scat_source
C C 0.0031 0.0016 'International Tables Vol C Tables 4.2.6.8 and 6.1.1.4'
H H 0.0000 0.0000 'International Tables Vol C Tables 4.2.6.8 and 6.1.1.4'
N N 0.0061 0.0033 'International Tables Vol C Tables 4.2.6.8 and 6.1.1.4'
O O 0.0109 0.0061 'International Tables Vol C Tables 4.2.6.8 and 6.1.1.4'
Fe Fe 0.3460 0.8476 'International Tables Vol C Tables 4.2.6.8 and 6.1.1.4'

_symmetry_cell_setting           monoclinic
_symmetry_space_group_name_H-M   'C 2/c'
_symmetry_int_tables_number      15
_chemical_absolute_configuration .

loop_
_symmetry_equiv_pos_as_xyz
'x, y, z'
'-x, y, -z+1/2'
'x+1/2, y+1/2, z'
'-x+1/2, y+1/2, -z+1/2'
'-x, -y, -z'
'x, -y, z-1/2'
'-x+1/2, -y+1/2, -z'
'x+1/2, -y+1/2, z-1/2'

_cell_length_a                   22.948(2)
_cell_length_b                   9.0760(8)
_cell_length_c                   11.9420(9)
_cell_angle_alpha                90.00
_cell_angle_beta                 119.587(2)
_cell_angle_gamma                90.00
_cell_volume                     2162.9(3)
_cell_formula_units_Z            4
_cell_measurement_temperature    100(1)
_cell_measurement_reflns_used    ?
_cell_measurement_theta_min      ?
_cell_measurement_theta_max      ?
_exptl_crystal_size_max          0.17
_exptl_crystal_size_mid          0.05
_exptl_crystal_size_min          0.01
_exptl_crystal_density_meas      ?
_exptl_crystal_density_diffrn    1.659
_exptl_crystal_density_method    'not measured'
_exptl_crystal_F_000             1104
_exptl_absorpt_coefficient_mu    0.756
_exptl_absorpt_correction_type   multi-scan
_exptl_absorpt_correction_T_min  0.8903
_exptl_absorpt_correction_T_max  0.9930
_exptl_absorpt_process_details   SADABS

_exptl_special_details           
; 
 ? 
;
_diffrn_radiation_probe          x-ray
_diffrn_radiation_type           MoK\a
_diffrn_radiation_wavelength     0.71073
_diffrn_source                   'fine-focus sealed tube'
_diffrn_source_type              'kappa X8 APEX II Bruker ICMMO'
_diffrn_radiation_monochromator  graphite
_diffrn_measurement_device_type  ?
_diffrn_measurement_method       ?
_diffrn_detector_area_resol_mean ?
_diffrn_standards_number         ?
_diffrn_standards_interval_count ?
_diffrn_standards_interval_time  ?
_diffrn_standards_decay_%        ?
_diffrn_reflns_number            13317
_diffrn_reflns_av_R_equivalents  0.0700
_diffrn_reflns_av_sigmaI/netI    0.0789
_diffrn_reflns_limit_h_min       -32
_diffrn_reflns_limit_h_max       31
_diffrn_reflns_limit_k_min       -12
_diffrn_reflns_limit_k_max       12
_diffrn_reflns_limit_l_min       -12
_diffrn_reflns_limit_l_max       17
_diffrn_reflns_theta_min         2.04
_diffrn_reflns_theta_max         30.52
_reflns_number_total             3294
_reflns_number_gt                2224
_reflns_threshold_expression     >2sigma(I)

_computing_data_collection       ?
_computing_cell_refinement       ?
_computing_data_reduction        ?
_computing_structure_solution    'SHELXS-97 (Sheldrick, 1990)'
_computing_structure_refinement  'SHELXL-97 (Sheldrick, 1997)'
_computing_molecular_graphics    ?
_computing_publication_material  ?

_refine_special_details          
; 
 Refinement of F^2^ against ALL reflections.  The weighted R-factor wR and 
 goodness of fit S are based on F^2^, conventional R-factors R are based 
 on F, with F set to zero for negative F^2^. The threshold expression of 
 F^2^ > 2sigma(F^2^) is used only for calculating R-factors(gt) etc. and is 
 not relevant to the choice of reflections for refinement.  R-factors based 
 on F^2^ are statistically about twice as large as those based on F, and R- 
 factors based on ALL data will be even larger. 
;


_refine_ls_structure_factor_coef Fsqd
_refine_ls_matrix_type           full
_refine_ls_weighting_scheme      calc
_refine_ls_weighting_details     
'calc w=1/[\s^2^(Fo^2^)+(0.0276P)^2^+2.4025P] where P=(Fo^2^+2Fc^2^)/3'
_atom_sites_solution_primary     direct
_atom_sites_solution_secondary   difmap
_atom_sites_solution_hydrogens   geom
_refine_ls_hydrogen_treatment    constr
_refine_ls_extinction_method     none
_refine_ls_extinction_coef       ?
_refine_ls_number_reflns         3294
_refine_ls_number_parameters     168
_refine_ls_number_restraints     0
_refine_ls_R_factor_all          0.0881
_refine_ls_R_factor_gt           0.0465
_refine_ls_wR_factor_ref         0.0961
_refine_ls_wR_factor_gt          0.0833
_refine_ls_goodness_of_fit_ref   1.041
_refine_ls_restrained_S_all      1.041
_refine_ls_shift/su_max          0.000
_refine_ls_shift/su_mean         0.000

loop_
_atom_site_label
_atom_site_type_symbol
_atom_site_fract_x
_atom_site_fract_y
_atom_site_fract_z
_atom_site_U_iso_or_equiv
_atom_site_adp_type
_atom_site_occupancy
_atom_site_symmetry_multiplicity
_atom_site_calc_flag
_atom_site_refinement_flags
_atom_site_disorder_assembly
_atom_site_disorder_group
C1 C -0.10814(11) 0.1893(3) 0.6026(2) 0.0174(5) Uani 1 1 d . . .
H1 H -0.1256 0.2105 0.6563 0.021 Uiso 1 1 calc R . .
C2 C -0.13983(11) 0.0851(3) 0.5070(2) 0.0190(5) Uani 1 1 d . . .
H2 H -0.1779 0.0374 0.4974 0.023 Uiso 1 1 calc R . .
C3 C -0.11505(11) 0.0518(3) 0.4258(2) 0.0196(5) Uani 1 1 d . . .
H3 H -0.1356 -0.0193 0.3620 0.024 Uiso 1 1 calc R . .
C4 C -0.05845(11) 0.1271(2) 0.4415(2) 0.0157(5) Uani 1 1 d . . .
H4 H -0.0409 0.1076 0.3875 0.019 Uiso 1 1 calc R . .
C5 C -0.02879(10) 0.2309(3) 0.53801(19) 0.0129(4) Uani 1 1 d . . .
C6 C 0.02883(10) 0.3189(2) 0.5630(2) 0.0128(4) Uani 1 1 d . . .
H6 H 0.0503 0.3119 0.5144 0.015 Uiso 1 1 calc R . .
C7 C 0.10135(10) 0.5102(2) 0.70619(19) 0.0124(4) Uani 1 1 d . . .
C8 C 0.10627(10) 0.5929(3) 0.81182(19) 0.0138(4) Uani 1 1 d . . .
C9 C 0.15689(11) 0.7003(3) 0.8669(2) 0.0166(5) Uani 1 1 d . . .
H9 H 0.1599 0.7591 0.9334 0.020 Uiso 1 1 calc R . .
C10 C 0.20177(11) 0.7191(3) 0.8238(2) 0.0159(5) Uani 1 1 d . . .
H10 H 0.2356 0.7891 0.8618 0.019 Uiso 1 1 calc R . .
C11 C 0.19623(10) 0.6319(3) 0.7218(2) 0.0141(5) Uani 1 1 d . . .
C12 C 0.14588(10) 0.5285(3) 0.6612(2) 0.0135(4) Uani 1 1 d . . .
H12 H 0.1422 0.4731 0.5925 0.016 Uiso 1 1 calc R . .
N1 N -0.05282(9) 0.2614(2) 0.62084(16) 0.0134(4) Uani 1 1 d . . .
N2 N 0.04788(8) 0.4088(2) 0.65946(15) 0.0115(3) Uani 1 1 d . . .
N3 N 0.24457(9) 0.6492(2) 0.67939(19) 0.0176(4) Uani 1 1 d . . .
O1 O 0.06386(7) 0.56739(18) 0.85220(13) 0.0158(3) Uani 1 1 d . . .
O2 O 0.29232(8) 0.7353(2) 0.73962(16) 0.0250(4) Uani 1 1 d . . .
O3 O 0.23810(8) 0.5768(2) 0.58633(16) 0.0246(4) Uani 1 1 d . . .
Fe Fe 0.0000 0.41031(6) 0.7500 0.01286(12) Uani 1 2 d S . .

loop_
_atom_site_aniso_label
_atom_site_aniso_U_11
_atom_site_aniso_U_22
_atom_site_aniso_U_33
_atom_site_aniso_U_23
_atom_site_aniso_U_13
_atom_site_aniso_U_12
C1 0.0152(11) 0.0196(13) 0.0202(12) 0.0029(10) 0.0110(10) -0.0002(10)
C2 0.0129(10) 0.0193(12) 0.0242(12) 0.0025(11) 0.0085(9) -0.0011(10)
C3 0.0158(11) 0.0181(13) 0.0182(11) -0.0017(9) 0.0032(9) 0.0006(10)
C4 0.0145(11) 0.0157(12) 0.0176(11) -0.0001(9) 0.0085(9) 0.0026(9)
C5 0.0116(10) 0.0151(11) 0.0129(10) 0.0026(9) 0.0067(8) 0.0035(9)
C6 0.0131(10) 0.0158(12) 0.0130(10) -0.0009(9) 0.0092(9) -0.0005(9)
C7 0.0111(10) 0.0146(11) 0.0109(10) 0.0001(9) 0.0050(8) 0.0004(9)
C8 0.0138(10) 0.0168(11) 0.0109(9) 0.0021(10) 0.0062(8) 0.0019(10)
C9 0.0174(11) 0.0195(13) 0.0109(10) -0.0035(9) 0.0055(9) -0.0016(10)
C10 0.0119(10) 0.0160(12) 0.0167(11) 0.0006(9) 0.0046(9) -0.0037(9)
C11 0.0103(10) 0.0165(12) 0.0158(11) 0.0041(9) 0.0067(9) 0.0010(9)
C12 0.0144(11) 0.0146(12) 0.0132(10) 0.0006(9) 0.0082(9) 0.0016(9)
N1 0.0126(9) 0.0150(10) 0.0151(9) 0.0025(8) 0.0088(8) 0.0009(8)
N2 0.0109(8) 0.0128(9) 0.0121(8) 0.0004(8) 0.0066(7) 0.0005(8)
N3 0.0147(9) 0.0160(10) 0.0238(10) 0.0041(8) 0.0108(8) 0.0013(8)
O1 0.0167(8) 0.0210(9) 0.0144(7) -0.0013(7) 0.0113(6) -0.0016(7)
O2 0.0154(8) 0.0235(10) 0.0373(10) -0.0016(8) 0.0139(8) -0.0067(8)
O3 0.0239(9) 0.0278(10) 0.0321(9) -0.0068(8) 0.0215(8) -0.0049(8)
Fe 0.0124(2) 0.0167(3) 0.0130(2) 0.000 0.00888(18) 0.000

_geom_special_details            
; 
 All esds (except the esd in the dihedral angle between two l.s. planes) 
 are estimated using the full covariance matrix.  The cell esds are taken 
 into account individually in the estimation of esds in distances, angles 
 and torsion angles; correlations between esds in cell parameters are only 
 used when they are defined by crystal symmetry.  An approximate (isotropic) 
 treatment of cell esds is used for estimating esds involving l.s. planes. 
;

loop_
_geom_bond_atom_site_label_1
_geom_bond_atom_site_label_2
_geom_bond_distance
_geom_bond_site_symmetry_2
_geom_bond_publ_flag
C1 N1 1.346(3) . ?
C1 C2 1.381(3) . ?
C2 C3 1.378(3) . ?
C3 C4 1.396(3) . ?
C4 C5 1.380(3) . ?
C5 N1 1.377(3) . ?
C5 C6 1.444(3) . ?
C6 N2 1.299(3) . ?
C7 C12 1.379(3) . ?
C7 N2 1.410(3) . ?
C7 C8 1.424(3) . ?
C8 O1 1.303(2) . ?
C8 C9 1.406(3) . ?
C9 C10 1.371(3) . ?
C10 C11 1.405(3) . ?
C11 C12 1.384(3) . ?
C11 N3 1.437(3) . ?
N1 Fe 1.9570(19) . ?
N2 Fe 1.8841(16) . ?
N3 O3 1.235(2) . ?
N3 O2 1.245(2) . ?
O1 Fe 1.9756(16) . ?
Fe N2 1.8841(16) 2_556 ?
Fe N1 1.9570(19) 2_556 ?
Fe O1 1.9756(16) 2_556 ?

loop_
_geom_angle_atom_site_label_1
_geom_angle_atom_site_label_2
_geom_angle_atom_site_label_3
_geom_angle
_geom_angle_site_symmetry_1
_geom_angle_site_symmetry_3
_geom_angle_publ_flag
N1 C1 C2 122.4(2) . . ?
C3 C2 C1 120.0(2) . . ?
C2 C3 C4 118.5(2) . . ?
C5 C4 C3 119.3(2) . . ?
N1 C5 C4 122.0(2) . . ?
N1 C5 C6 113.04(19) . . ?
C4 C5 C6 124.98(19) . . ?
N2 C6 C5 113.77(18) . . ?
C12 C7 N2 126.30(19) . . ?
C12 C7 C8 122.1(2) . . ?
N2 C7 C8 111.58(18) . . ?
O1 C8 C9 123.1(2) . . ?
O1 C8 C7 119.2(2) . . ?
C9 C8 C7 117.79(19) . . ?
C10 C9 C8 120.7(2) . . ?
C9 C10 C11 119.5(2) . . ?
C12 C11 C10 122.01(19) . . ?
C12 C11 N3 118.71(19) . . ?
C10 C11 N3 119.3(2) . . ?
C7 C12 C11 117.8(2) . . ?
C1 N1 C5 117.77(19) . . ?
C1 N1 Fe 129.10(15) . . ?
C5 N1 Fe 113.13(14) . . ?
C6 N2 C7 127.37(17) . . ?
C6 N2 Fe 118.53(15) . . ?
C7 N2 Fe 114.10(13) . . ?
O3 N3 O2 122.27(18) . . ?
O3 N3 C11 119.23(19) . . ?
O2 N3 C11 118.49(19) . . ?
C8 O1 Fe 111.19(13) . . ?
N2 Fe N2 179.17(12) . 2_556 ?
N2 Fe N1 81.52(7) . . ?
N2 Fe N1 97.90(8) 2_556 . ?
N2 Fe N1 97.90(7) . 2_556 ?
N2 Fe N1 81.52(7) 2_556 2_556 ?
N1 Fe N1 92.62(11) . 2_556 ?
N2 Fe O1 96.64(7) . 2_556 ?
N2 Fe O1 83.97(7) 2_556 2_556 ?
N1 Fe O1 91.70(7) . 2_556 ?
N1 Fe O1 165.29(6) 2_556 2_556 ?
N2 Fe O1 83.97(7) . . ?
N2 Fe O1 96.64(7) 2_556 . ?
N1 Fe O1 165.29(6) . . ?
N1 Fe O1 91.70(7) 2_556 . ?
O1 Fe O1 87.63(9) 2_556 . ?

loop_
_geom_torsion_atom_site_label_1
_geom_torsion_atom_site_label_2
_geom_torsion_atom_site_label_3
_geom_torsion_atom_site_label_4
_geom_torsion
_geom_torsion_site_symmetry_1
_geom_torsion_site_symmetry_2
_geom_torsion_site_symmetry_3
_geom_torsion_site_symmetry_4
_geom_torsion_publ_flag
N1 C1 C2 C3 -0.1(4) . . . . ?
C1 C2 C3 C4 -1.0(3) . . . . ?
C2 C3 C4 C5 0.7(3) . . . . ?
C3 C4 C5 N1 0.9(3) . . . . ?
C3 C4 C5 C6 -178.5(2) . . . . ?
N1 C5 C6 N2 0.9(3) . . . . ?
C4 C5 C6 N2 -179.7(2) . . . . ?
C12 C7 C8 O1 -178.0(2) . . . . ?
N2 C7 C8 O1 0.4(3) . . . . ?
C12 C7 C8 C9 2.7(3) . . . . ?
N2 C7 C8 C9 -178.98(19) . . . . ?
O1 C8 C9 C10 177.6(2) . . . . ?
C7 C8 C9 C10 -3.0(3) . . . . ?
C8 C9 C10 C11 1.2(3) . . . . ?
C9 C10 C11 C12 1.1(3) . . . . ?
C9 C10 C11 N3 -178.2(2) . . . . ?
N2 C7 C12 C11 -178.5(2) . . . . ?
C8 C7 C12 C11 -0.4(3) . . . . ?
C10 C11 C12 C7 -1.5(3) . . . . ?
N3 C11 C12 C7 177.87(19) . . . . ?
C2 C1 N1 C5 1.6(3) . . . . ?
C2 C1 N1 Fe -179.41(17) . . . . ?
C4 C5 N1 C1 -2.0(3) . . . . ?
C6 C5 N1 C1 177.46(19) . . . . ?
C4 C5 N1 Fe 178.89(17) . . . . ?
C6 C5 N1 Fe -1.7(2) . . . . ?
C5 C6 N2 C7 -178.87(19) . . . . ?
C5 C6 N2 Fe 0.4(3) . . . . ?
C12 C7 N2 C6 -3.1(4) . . . . ?
C8 C7 N2 C6 178.6(2) . . . . ?
C12 C7 N2 Fe 177.51(18) . . . . ?
C8 C7 N2 Fe -0.8(2) . . . . ?
C12 C11 N3 O3 3.5(3) . . . . ?
C10 C11 N3 O3 -177.1(2) . . . . ?
C12 C11 N3 O2 -175.3(2) . . . . ?
C10 C11 N3 O2 4.1(3) . . . . ?
C9 C8 O1 Fe 179.49(17) . . . . ?
C7 C8 O1 Fe 0.1(2) . . . . ?
C6 N2 Fe N1 -1.09(16) . . . . ?
C7 N2 Fe N1 178.31(16) . . . . ?
C6 N2 Fe N1 90.39(17) . . . 2_556 ?
C7 N2 Fe N1 -90.21(15) . . . 2_556 ?
C6 N2 Fe O1 -91.83(17) . . . 2_556 ?
C7 N2 Fe O1 87.57(15) . . . 2_556 ?
C6 N2 Fe O1 -178.72(17) . . . . ?
C7 N2 Fe O1 0.68(14) . . . . ?
C1 N1 Fe N2 -177.5(2) . . . . ?
C5 N1 Fe N2 1.51(15) . . . . ?
C1 N1 Fe N2 3.1(2) . . . 2_556 ?
C5 N1 Fe N2 -177.89(15) . . . 2_556 ?
C1 N1 Fe N1 84.89(19) . . . 2_556 ?
C5 N1 Fe N1 -96.10(15) . . . 2_556 ?
C1 N1 Fe O1 -81.0(2) . . . 2_556 ?
C5 N1 Fe O1 97.97(15) . . . 2_556 ?
C1 N1 Fe O1 -168.2(2) . . . . ?
C5 N1 Fe O1 10.8(4) . . . . ?
C8 O1 Fe N2 -0.46(14) . . . . ?
C8 O1 Fe N2 178.97(14) . . . 2_556 ?
C8 O1 Fe N1 -9.7(4) . . . . ?
C8 O1 Fe N1 97.31(15) . . . 2_556 ?
C8 O1 Fe O1 -97.39(14) . . . 2_556 ?

_diffrn_measured_fraction_theta_max 0.995
_diffrn_reflns_theta_full        25.00
_diffrn_measured_fraction_theta_full 1.000
_refine_diff_density_max         0.420
_refine_diff_density_min         -0.457
_refine_diff_density_rms         0.094

data_FeII(qsal-5-NO2)2_100K
#1909GuillotICMMO

_database_code_CSD              'CCDC 991081'

_audit_creation_method           SHELXL-97
_chemical_name_systematic        ?
_chemical_name_common            ?
_chemical_formula_moiety         'C32 H20 Fe N6 O6'
_chemical_formula_sum            'C32 H20 Fe N6 O6'
_chemical_melting_point          ?

_exptl_crystal_description       plate
_exptl_crystal_colour            black

_diffrn_ambient_temperature      100(1)
_chemical_formula_weight         640.39

loop_
_atom_type_symbol
_atom_type_description
_atom_type_scat_dispersion_real
_atom_type_scat_dispersion_imag
_atom_type_scat_source
C C 0.0033 0.0016 'International Tables Vol C Tables 4.2.6.8 and 6.1.1.4'
H H 0.0000 0.0000 'International Tables Vol C Tables 4.2.6.8 and 6.1.1.4'
N N 0.0061 0.0033 'International Tables Vol C Tables 4.2.6.8 and 6.1.1.4'
O O 0.0106 0.0060 'International Tables Vol C Tables 4.2.6.8 and 6.1.1.4'
Fe Fe 0.3463 0.8444 'International Tables Vol C Tables 4.2.6.8 and 6.1.1.4'

_symmetry_cell_setting           orthorhombic
_symmetry_space_group_name_H-M   'P c c a'
_symmetry_int_tables_number      54
_chemical_absolute_configuration .

loop_
_symmetry_equiv_pos_as_xyz
'x, y, z'
'-x+1/2, -y, z'
'-x, y, -z+1/2'
'x+1/2, -y, -z+1/2'
'-x, -y, -z'
'x-1/2, y, -z'
'x, -y, z-1/2'
'-x-1/2, y, z-1/2'

_cell_length_a                   19.2422(13)
_cell_length_b                   10.4155(9)
_cell_length_c                   12.9086(10)
_cell_angle_alpha                90.00
_cell_angle_beta                 90.00
_cell_angle_gamma                90.00
_cell_volume                     2587.1(3)
_cell_formula_units_Z            4
_cell_measurement_temperature    100(1)
_cell_measurement_reflns_used    2310
_cell_measurement_theta_min        2.73
_cell_measurement_theta_max       21.68
_exptl_crystal_size_max          0.21
_exptl_crystal_size_mid          0.08
_exptl_crystal_size_min          0.01
_exptl_crystal_density_meas      ?
_exptl_crystal_density_diffrn    1.644
_exptl_crystal_density_method    'not measured'
_exptl_crystal_F_000             1312
_exptl_absorpt_coefficient_mu    0.647
_exptl_absorpt_correction_type   multi-scan
_exptl_absorpt_correction_T_min  0.8761
_exptl_absorpt_correction_T_max  0.9936
_exptl_absorpt_process_details   SADABS

_exptl_special_details           
; 
 ? 
;
_diffrn_radiation_probe          x-ray
_diffrn_radiation_type           MoK\a
_diffrn_radiation_wavelength     0.71073
_diffrn_source                   'fine-focus sealed tube'
_diffrn_source_type              'kappa X8 APEX II Bruker ICMMO'
_diffrn_radiation_monochromator  graphite
_diffrn_measurement_device_type  ?
_diffrn_measurement_method       ?
_diffrn_detector_area_resol_mean ?
_diffrn_standards_number         ?
_diffrn_standards_interval_count ?
_diffrn_standards_interval_time  ?
_diffrn_standards_decay_%        ?
_diffrn_reflns_number            33767
_diffrn_reflns_av_R_equivalents  0.1201
_diffrn_reflns_av_sigmaI/netI    0.0443
_diffrn_reflns_limit_h_min       -21
_diffrn_reflns_limit_h_max       20
_diffrn_reflns_limit_k_min       -11
_diffrn_reflns_limit_k_max       11
_diffrn_reflns_limit_l_min       -14
_diffrn_reflns_limit_l_max       14
_diffrn_reflns_theta_min         1.96
_diffrn_reflns_theta_max         23.32
#_reflns_number_total             2184 (with extinctions)
#_reflns_number_gt                1395
_reflns_number_total              1884 
_reflns_number_gt                 1295 
_reflns_threshold_expression     >2sigma(I)

_computing_data_collection      'Bruker APEX2'
_computing_cell_refinement      'Bruker SAINT'
_computing_data_reduction       'Bruker SAINT'
_computing_structure_solution    'SHELXS-97 (Sheldrick, 1990)'
_computing_structure_refinement  'SHELXL-97 (Sheldrick, 1997)'
_computing_molecular_graphics    ?
_computing_publication_material  ?

_refine_special_details          
; 
 Refinement of F^2^ against ALL reflections.  The weighted R-factor wR and 
 goodness of fit S are based on F^2^, conventional R-factors R are based 
 on F, with F set to zero for negative F^2^. The threshold expression of 
 F^2^ > 2sigma(F^2^) is used only for calculating R-factors(gt) etc. and is 
 not relevant to the choice of reflections for refinement.  R-factors based 
 on F^2^ are statistically about twice as large as those based on F, and R- 
 factors based on ALL data will be even larger. 
;


# start Validation Reply Form
_vrf_THETM01_FeIIqsal-5-NO22_100K
;
PROBLEM: The value of sine(theta_max)/wavelength is less than 0.575
RESPONSE: This B-type alert is related to the small size of single-crystals 
systematically isolated with this neutral complex and their weak diffracting
 power at high value of theta angles. 
;
# end Validation Reply Form


_refine_ls_structure_factor_coef Fsqd
_refine_ls_matrix_type           full
_refine_ls_weighting_scheme      calc
_refine_ls_weighting_details     
'calc w=1/[\s^2^(Fo^2^)+(0.0736P)^2^+4.4874P] where P=(Fo^2^+2Fc^2^)/3'
_atom_sites_solution_primary     direct
_atom_sites_solution_secondary   difmap
_atom_sites_solution_hydrogens   geom
_refine_ls_hydrogen_treatment    constr
_refine_ls_extinction_method     none
_refine_ls_extinction_coef       ?
_refine_ls_number_reflns         1884 
#_refine_ls_number_reflns         2184
_refine_ls_number_parameters     204
_refine_ls_number_restraints     0
_refine_ls_R_factor_all          0.0902
_refine_ls_R_factor_gt           0.0547
_refine_ls_wR_factor_ref         0.1557
_refine_ls_wR_factor_gt          0.1333
_refine_ls_goodness_of_fit_ref   1.036
_refine_ls_restrained_S_all      1.036
_refine_ls_shift/su_max          0.000
_refine_ls_shift/su_mean         0.000

loop_
_atom_site_label
_atom_site_type_symbol
_atom_site_fract_x
_atom_site_fract_y
_atom_site_fract_z
_atom_site_U_iso_or_equiv
_atom_site_adp_type
_atom_site_occupancy
_atom_site_symmetry_multiplicity
_atom_site_calc_flag
_atom_site_refinement_flags
_atom_site_disorder_assembly
_atom_site_disorder_group
Fe Fe 0.5000 0.35275(9) 0.2500 0.0277(3) Uani 1 2 d S . .
N1 N 0.4336(2) 0.2217(4) 0.2088(3) 0.0302(10) Uani 1 1 d . . .
C11 C 0.3892(3) 0.5174(5) 0.3883(4) 0.0307(12) Uani 1 1 d . . .
N2 N 0.5255(2) 0.3495(4) 0.1053(3) 0.0291(10) Uani 1 1 d . . .
O1 O 0.43285(16) 0.4851(3) 0.2150(2) 0.0305(9) Uani 1 1 d . . .
C12 C 0.3913(3) 0.5409(5) 0.2781(4) 0.0316(13) Uani 1 1 d . . .
C5 C 0.4398(3) 0.1880(5) 0.1059(4) 0.0329(13) Uani 1 1 d . . .
C4 C 0.3991(3) 0.0887(5) 0.0619(5) 0.0396(14) Uani 1 1 d . . .
C1 C 0.3876(3) 0.1609(5) 0.2645(4) 0.0368(13) Uani 1 1 d . . .
H1 H 0.3825 0.1842 0.3336 0.044 Uiso 1 1 calc R . .
C16 C 0.3430(3) 0.5900(5) 0.4492(4) 0.0359(13) Uani 1 1 d . . .
H16 H 0.3422 0.5776 0.5206 0.043 Uiso 1 1 calc R . .
C2 C 0.3451(3) 0.0615(5) 0.2253(5) 0.0449(15) Uani 1 1 d . . .
H2 H 0.3131 0.0213 0.2684 0.054 Uiso 1 1 calc R . .
O3 O 0.2229(2) 0.8404(5) 0.4353(4) 0.0725(15) Uani 1 1 d . . .
C10 C 0.5689(3) 0.4256(5) 0.0604(4) 0.0322(12) Uani 1 1 d . . .
H10 H 0.5730 0.4196 -0.0112 0.039 Uiso 1 1 calc R . .
C13 C 0.3439(3) 0.6333(5) 0.2386(5) 0.0400(14) Uani 1 1 d . . .
H13 H 0.3434 0.6489 0.1677 0.048 Uiso 1 1 calc R . .
C15 C 0.2993(3) 0.6782(5) 0.4058(5) 0.0416(15) Uani 1 1 d . . .
C9 C 0.4883(2) 0.2553(5) 0.0468(4) 0.0314(12) Uani 1 1 d . . .
O2 O 0.2541(2) 0.7290(4) 0.5648(3) 0.0643(13) Uani 1 1 d . . .
C3 C 0.3508(3) 0.0252(5) 0.1267(5) 0.0421(15) Uani 1 1 d . . .
H3 H 0.3235 -0.0411 0.1008 0.050 Uiso 1 1 calc R . .
N3 N 0.2552(3) 0.7507(5) 0.4720(4) 0.0497(13) Uani 1 1 d . . .
C8 C 0.4964(3) 0.2268(6) -0.0561(4) 0.0447(14) Uani 1 1 d . . .
H8 H 0.5286 0.2708 -0.0964 0.054 Uiso 1 1 calc R . .
C14 C 0.2993(3) 0.6998(6) 0.3003(4) 0.0436(15) Uani 1 1 d . . .
H14 H 0.2689 0.7595 0.2715 0.052 Uiso 1 1 calc R . .
C6 C 0.4075(3) 0.0626(6) -0.0417(5) 0.0495(16) Uani 1 1 d . . .
H6 H 0.3808 -0.0009 -0.0729 0.059 Uiso 1 1 calc R . .
C7 C 0.4551(3) 0.1301(6) -0.0991(5) 0.0538(18) Uani 1 1 d . . .
H7 H 0.4601 0.1108 -0.1690 0.065 Uiso 1 1 calc R . .

loop_
_atom_site_aniso_label
_atom_site_aniso_U_11
_atom_site_aniso_U_22
_atom_site_aniso_U_33
_atom_site_aniso_U_23
_atom_site_aniso_U_13
_atom_site_aniso_U_12
Fe 0.0244(6) 0.0314(6) 0.0273(6) 0.000 0.0014(5) 0.000
N1 0.026(2) 0.035(3) 0.030(2) -0.001(2) -0.0006(19) 0.000(2)
C11 0.034(3) 0.028(3) 0.030(3) -0.001(2) 0.001(2) -0.003(2)
N2 0.024(2) 0.034(2) 0.029(2) -0.001(2) 0.0011(19) 0.0033(19)
O1 0.0281(18) 0.036(2) 0.0274(19) -0.0046(16) 0.0021(16) 0.0038(17)
C12 0.027(3) 0.037(3) 0.031(3) -0.006(2) 0.002(2) -0.001(2)
C5 0.022(3) 0.036(3) 0.041(3) -0.007(3) -0.005(3) 0.007(2)
C4 0.027(3) 0.038(3) 0.053(4) -0.011(3) -0.011(3) 0.001(3)
C1 0.031(3) 0.042(3) 0.038(3) -0.003(3) 0.001(3) -0.006(3)
C16 0.039(3) 0.039(3) 0.030(3) -0.008(3) 0.006(3) -0.002(3)
C2 0.034(3) 0.043(3) 0.058(4) 0.006(3) -0.004(3) -0.010(3)
O3 0.059(3) 0.097(4) 0.062(3) -0.035(3) -0.012(2) 0.045(3)
C10 0.030(3) 0.041(3) 0.026(3) 0.002(3) 0.002(2) 0.004(3)
C13 0.040(3) 0.043(3) 0.038(3) -0.002(3) -0.002(3) 0.009(3)
C15 0.030(3) 0.043(4) 0.051(4) -0.013(3) 0.006(3) 0.006(3)
C9 0.026(3) 0.038(3) 0.030(3) -0.010(2) -0.002(2) 0.005(2)
O2 0.067(3) 0.070(3) 0.055(3) -0.013(3) 0.025(3) 0.010(3)
C3 0.030(3) 0.036(3) 0.060(4) -0.009(3) -0.011(3) -0.003(3)
N3 0.051(3) 0.057(3) 0.041(3) -0.012(3) -0.003(3) 0.009(3)
C8 0.036(3) 0.058(4) 0.039(3) -0.011(3) -0.002(3) 0.001(3)
C14 0.042(4) 0.046(3) 0.043(4) -0.016(3) -0.013(3) 0.018(3)
C6 0.037(3) 0.056(4) 0.056(4) -0.018(3) -0.008(3) -0.004(3)
C7 0.049(4) 0.073(5) 0.039(4) -0.024(3) -0.005(3) 0.000(4)

_geom_special_details            
; 
 All esds (except the esd in the dihedral angle between two l.s. planes) 
 are estimated using the full covariance matrix.  The cell esds are taken 
 into account individually in the estimation of esds in distances, angles 
 and torsion angles; correlations between esds in cell parameters are only 
 used when they are defined by crystal symmetry.  An approximate (isotropic) 
 treatment of cell esds is used for estimating esds involving l.s. planes. 
;

loop_
_geom_bond_atom_site_label_1
_geom_bond_atom_site_label_2
_geom_bond_distance
_geom_bond_site_symmetry_2
_geom_bond_publ_flag
Fe N2 1.932(4) . ?
Fe N2 1.932(4) 3_655 ?
Fe O1 1.943(3) . ?
Fe O1 1.943(3) 3_655 ?
Fe N1 1.944(4) 3_655 ?
Fe N1 1.944(4) . ?
N1 C1 1.304(6) . ?
N1 C5 1.379(6) . ?
C11 C16 1.407(7) . ?
C11 C10 1.415(7) 3_655 ?
C11 C12 1.445(7) . ?
N2 C10 1.289(6) . ?
N2 C9 1.430(6) . ?
O1 C12 1.281(6) . ?
C12 C13 1.420(7) . ?
C5 C9 1.394(7) . ?
C5 C4 1.416(7) . ?
C4 C6 1.374(8) . ?
C4 C3 1.413(8) . ?
C1 C2 1.413(7) . ?
C16 C15 1.366(8) . ?
C2 C3 1.332(8) . ?
O3 N3 1.218(6) . ?
C10 C11 1.415(7) 3_655 ?
C13 C14 1.361(8) . ?
C15 C14 1.381(8) . ?
C15 N3 1.422(7) . ?
C9 C8 1.370(7) . ?
O2 N3 1.220(6) . ?
C8 C7 1.398(8) . ?
C6 C7 1.373(8) . ?

loop_
_geom_angle_atom_site_label_1
_geom_angle_atom_site_label_2
_geom_angle_atom_site_label_3
_geom_angle
_geom_angle_site_symmetry_1
_geom_angle_site_symmetry_3
_geom_angle_publ_flag
N2 Fe N2 178.0(3) . 3_655 ?
N2 Fe O1 87.47(15) . . ?
N2 Fe O1 93.94(16) 3_655 . ?
N2 Fe O1 93.94(16) . 3_655 ?
N2 Fe O1 87.47(15) 3_655 3_655 ?
O1 Fe O1 89.6(2) . 3_655 ?
N2 Fe N1 94.93(17) . 3_655 ?
N2 Fe N1 83.68(17) 3_655 3_655 ?
O1 Fe N1 177.57(15) . 3_655 ?
O1 Fe N1 89.83(15) 3_655 3_655 ?
N2 Fe N1 83.68(17) . . ?
N2 Fe N1 94.93(17) 3_655 . ?
O1 Fe N1 89.83(15) . . ?
O1 Fe N1 177.57(15) 3_655 . ?
N1 Fe N1 90.8(2) 3_655 . ?
C1 N1 C5 117.8(5) . . ?
C1 N1 Fe 129.5(4) . . ?
C5 N1 Fe 112.7(3) . . ?
C16 C11 C10 117.5(5) . 3_655 ?
C16 C11 C12 118.5(5) . . ?
C10 C11 C12 124.0(5) 3_655 . ?
C10 N2 C9 120.6(4) . . ?
C10 N2 Fe 126.1(4) . . ?
C9 N2 Fe 113.3(3) . . ?
C12 O1 Fe 126.1(3) . . ?
O1 C12 C13 118.7(5) . . ?
O1 C12 C11 124.5(5) . . ?
C13 C12 C11 116.8(5) . . ?
N1 C5 C9 117.2(5) . . ?
N1 C5 C4 121.6(5) . . ?
C9 C5 C4 121.2(5) . . ?
C6 C4 C3 124.0(5) . . ?
C6 C4 C5 118.0(6) . . ?
C3 C4 C5 117.9(5) . . ?
N1 C1 C2 123.4(5) . . ?
C15 C16 C11 121.4(5) . . ?
C3 C2 C1 120.2(6) . . ?
N2 C10 C11 125.0(5) . 3_655 ?
C14 C13 C12 122.7(6) . . ?
C16 C15 C14 121.0(5) . . ?
C16 C15 N3 118.6(6) . . ?
C14 C15 N3 120.4(5) . . ?
C8 C9 C5 119.9(5) . . ?
C8 C9 N2 127.1(5) . . ?
C5 C9 N2 113.0(4) . . ?
C2 C3 C4 119.1(5) . . ?
O3 N3 O2 121.0(5) . . ?
O3 N3 C15 118.6(5) . . ?
O2 N3 C15 120.2(5) . . ?
C9 C8 C7 118.4(6) . . ?
C13 C14 C15 119.6(5) . . ?
C4 C6 C7 120.2(6) . . ?
C6 C7 C8 122.3(6) . . ?

_diffrn_measured_fraction_theta_max 0.998
_diffrn_reflns_theta_full        23.32
_diffrn_measured_fraction_theta_full 0.998
_refine_diff_density_max         0.797
_refine_diff_density_min         -0.517
_refine_diff_density_rms         0.081
